# Supplementary material for: Control of Grain Shape and Size in Rice by Two Functional Alleles of OsPUB3 in Varied Genetic Background
Source: MDPI journal article supplement (doi:10.3390/plants11192530), 2022-09-27
Supplement: s1 [file s1]

|                     |                                                                                                         |     |
|---------------------|---------------------------------------------------------------------------------------------------------|-----|
| NIL <sup>Z597</sup> | MAGNPAAAAAPSSSGSSSVFLPPPSPSDGELRLHLRLARDLSAVDTPAPFLRAAFASISRRSKLLAAAFDDLLLCGAAGELPRASASLCIREVLLVLQRFK   | 100 |
| NIL <sup>M46</sup>  | MAGNPAAAAAPSSSGSSSVFLPPPSPSDGELRLHLRLARDLSAVDTPAPFLRAAFASISRRSKLLAAAFDDLLLCGAAGELPRASASLCIREVLLVLQRFK   | 100 |
| ZH161               | MAGNPAAAAAPSSSGSSSVFLPPPSPSDGELRLHLRLARDLSAVDTPAPFLRAAFASISRRSKLLAAAFDDLLLCGAAGELPRASASLCIREVLLVLQRFK   | 100 |
| KO-ZS-1             | MAGNPAAAAAPSSSGSSSVFLPPPSPSDGELSGRCTAWRATCP PSTTRPRRSCAPRSRPSRGGPSYWRPRSTTCCCAAPRGSCRGRRRCACGRCSWCCSGSR | 100 |
| KO-ZS-2             | MAGNPAAAAAPSSSGSSSVFLPPPSPSDGELSPVAAPPGARPVRRRHHARAVPARRVRVHLEAVQATGGVRVRPAAVRRRGGAAAVGVAVPAGGAPGAAAVQ  | 100 |
| KO-MY-1             | MAGNPAAAAAPSSSGSSSVFLPPPSPSDGELSPVAAPPGARPVRRRHHARAVPARRVRVHLEAVQATGGVRVRPAAVRRRGGAAAVGVAVPAGGAPGAAAVQ  | 100 |
| KO-MY-2a            | MAGNPAAAAAPSSSGSSSVFLPPPSPSDGELSPVAAPPGARPVRRRHHARAVPARRVRVHLEAVQATGGVRVRPAAVRRRGGAAAVGVAVPAGGAPGAAAVQ  | 100 |
| Ko-MY-2b            | MAGNPAAAAAPSSSGSSSVFLPPPSPSDGELSGRCTAWRATCP PSTTRPRRSCAPRSRPSRGGPSYWRPRSTTCCCAAPRGSCRGRRRCACGRCSWCCSGSR | 100 |
| KO-MY-3a            | MAGNPAAAAAPSSSGSSSVFLPPPSPSDGELTPVAAPPGARPVRRRHHARAVPARRVRVHLEAVQATGGVRVRPAAVRRRGGAAAVGVAVPAGGAPGAAAVQ  | 100 |
| KO-MY-3b            | MAGNPAAAAAPSSSGSSSVFLPPPSPSDGELSGRCTAWRATCP PSTTRPRRSCAPRSRPSRGGPSYWRPRSTTCCCAAPRGSCRGRRRCACGRCSWCCSGSR | 100 |
| KO-MY-4a            | MAGNPAAAAAPSSSGSSSVFLPPPSPSDGELTPVAAPPGARPVRRRHHARAVPARRVRVHLEAVQATGGVRVRPAAVRRRGGAAAVGVAVPAGGAPGAAAVQ  | 100 |
| KO-MY-4b            | MAGNPAAAAAPSSSGSSSVFLPPPSPSDGELSGRCTAWRATCP PSTTRPRRSCAPRSRPSRGGPSYWRPRSTTCCCAAPRGSCRGRRRCACGRCSWCCSGSR | 100 |
| KO-MY-5a            | MAGNPAAAAAPSSSGSSSVFLPPPSPSDGELPPVAAPPGARPVRRRHHARAVPARRVRVHLEAVQATGGVRVRPAAVRRRGGAAAVGVAVPAGGAPGAAAVQ  | 100 |
| KO-MY-5b            | MAGNPAAAAAPSSSGSSSVFLPPPSPSDGELSGRCTAWRATCP PSTTRPRRSCAPRSRPSRGGPSYWRPRSTTCCCAAPRGSCRGRRRCACGRCSWCCSGSR | 100 |
| KO-MY-6a            | MAGNPAAAAAPSSSGSSSVFLPPPSPSDGELSPVAAPPGARPVRRRHHARAVPARRVRVHLEAVQATGGVRVRPAAVRRRGGAAAVGVAVPAGGAPGAAAVQ  | 100 |
| KO-MY-6b            | MAGNPAAAAAPSSSGSSSVFLPPPSPSDGELSGRCTAWRATCP PSTTRPRRSCAPRSRPSRGGPSYWRPRSTTCCCAAPRGSCRGRRRCACGRCSWCCSGSR | 100 |
| KO-MY-7a            | MAGNPAAAAAPSSSGSSSVFLPPPSPSDGELTPVAAPPGARPVRRRHHARAVPARRVRVHLEAVQATGGVRVRPAAVRRRGGAAAVGVAVPAGGAPGAAAVQ  | 100 |
| KO-MY-7b            | MAGNPAAAAAPSSSGSSSVFLPPPSPSDGELSGRCTAWRATCP PSTTRPRRSCAPRSRPSRGGPSYWRPRSTTCCCAAPRGSCRGRRRCACGRCSWCCSGSR | 100 |
| KO-ZH-1a            | MAGNPAAAAAPSSSGSSSVFLPPPSPSDTAWRATCP PSTTRPRRSCAPRSRPSRGGPSYWRPRSTTCCCAAPRGSCRGRRRCACGRCSWCCSGSRSSPIAR  | 100 |
| KO-ZH-1b            | MAGNPAAAAAPSSSGSSSVFLPPPSPGARPVRRRHHARAVPARRVRVHLEAVQATGGVRVRPAAVRRRGGAAAVGVAVPAGGAPGAAAVQDRRRLLGAPD    | 100 |
| KO-ZH-2a            | MAGNPAAAAAPSSSGSSSVFLPPPSPSDGELTPVAAPPGARPVRRRHHARAVPARRVRVHLEAVQATGGVRVRPAAVRRRGGAAAVGVAVPAGGAPGAAAVQ  | 100 |
| KO-ZH-2b            | MAGNPAAAAAPSSSGSSSVFLPPPSPDGCTAWRATCP PSTTRPRRSCAPRSRPSRGGPSYWRPRSTTCCCAAPRGSCRGRRRCACGRCSWCCSGSRSSP    | 100 |
| KO-ZH-3a            | MAGNPAAAAAPSSSGSSSVFLPPPSPSDGELSPVAAPPGARPVRRRHHARAVPARRVRVHLEAVQATGGVRVRPAAVRRRGGAAAVGVAVPAGGAPGAAAVQ  | 100 |
| KO-ZH-3b            | MAGNPAAAAAPSSSGSSSVFLPPPSPSDGELSGRCTAWRATCP PSTTRPRRSCAPRSRPSRGGPSYWRPRSTTCCCAAPRGSCRGRRRCACGRCSWCCSGSR | 100 |
| NIL <sup>Z597</sup> | AIVADCSARSMRLLLESDEMAEALRELNHDLATLLDLLPVVELGLADDVLDVLALASRQCRRCSAPASEEALKASVLSLIQEIEREIVPERERLEEIL      | 200 |
| NIL <sup>M46</sup>  | AIVADCSARSMRLLLESDEMAEALRELNHDLATLLDLLPVVELGLADDVLDVLALASRQCRRCSAPASEEALKASVLSLIQEIEREIVPERERLEEIL      | 200 |
| ZH161               | AIVADCSARSMRLLLESDEMAEALRELNHDLATLLDLLPVVELGLADDVLDVLALASRQCRRCSAPASEEALKASVLSLIQEIEREIVPERERLEEIL      | 200 |
| KO-ZS-1             | RSSPIARRAAGCGCCWSPTRWRRSCGSSTTTWPRCSTCCRSSSWGSPPTCSTSSPSRRASAGGARHRHSRRRR.                              | 200 |
| KO-ZS-2             | GDRRRLGAPDAAAAGVRRDGGGAAGAQP RP GHAARPVAGRRAGARRRRARRPRPRVAPVPVAVLAGTGVGGGAEGERA VADTRDRAGDRAGAGEAGGDP  | 200 |
| KO-MY-1             | GDRRRLGAPDAAAAGVRRDGGGAAGAQP RP GHAARPVAGRRAGARRRRARRPRPRVAPVPVAVLAGTGVGGGAEGERA VADTRDRAGDRAGAGEAGGDP  | 200 |
| KO-MY-2a            | GDRRRLGAPDAAAAGVRRDGGGAAGAQP RP GHAARPVAGRRAGARRRRARRPRPRVAPVPVAVLAGTGVGGGAEGERA VADTRDRAGDRAGAGEAGGDP  | 200 |
| KO-MY-2b            | RSSPIARRAAGCGCCWSPTRWRRSCGSSTTTWPRCSTCCRSSSWGSPPTCSTSSPSRRASAGGARHRHSRRRR                               | 200 |
| KO-MY-3a            | GDRRRLGAPDAAAAGVRRDGGGAAGAQP RP GHAARPVAGRRAGARRRRARRPRPRVAPVPVAVLAGTGVGGGAEGERA VADTRDRAGDRAGAGEAGGDP  | 200 |
| KO-MY-3b            | RSSPIARRAAGCGCCWSPTRWRRSCGSSTTTWPRCSTCCRSSSWGSPPTCSTSSPSRRASAGGARHRHSRRRR                               | 200 |
| KO-MY-4a            | GDRRRLGAPDAAAAGVRRDGGGAAGAQP RP GHAARPVAGRRAGARRRRARRPRPRVAPVPVAVLAGTGVGGGAEGERA VADTRDRAGDRAGAGEAGGDP  | 200 |
| KO-MY-4b            | RSSPIARRAAGCGCCWSPTRWRRSCGSSTTTWPRCSTCCRSSSWGSPPTCSTSSPSRRASAGGARHRHSRRRR                               | 200 |
| KO-MY-5a            | GDRRRLGAPDAAAAGVRRDGGGAAGAQP RP GHAARPVAGRRAGARRRRARRPRPRVAPVPVAVLAGTGVGGGAEGERA VADTRDRAGDRAGAGEAGGDP  | 200 |
| KO-MY-5b            | RSSPIARRAAGCGCCWSPTRWRRSCGSSTTTWPRCSTCCRSSSWGSPPTCSTSSPSRRASAGGARHRHSRRRR                               | 200 |
| KO-MY-6a            | GDRRRLGAPDAAAAGVRRDGGGAAGAQP RP GHAARPVAGRRAGARRRRARRPRPRVAPVPVAVLAGTGVGGGAEGERA VADTRDRAGDRAGAGEAGGDP  | 200 |
| KO-MY-6b            | RSSPIARRAAGCGCCWSPTRWRRSCGSSTTTWPRCSTCCRSSSWGSPPTCSTSSPSRRASAGGARHRHSRRRR                               | 200 |
| KO-MY-7a            | GDRRRLGAPDAAAAGVRRDGGGAAGAQP RP GHAARPVAGRRAGARRRRARRPRPRVAPVPVAVLAGTGVGGGAEGERA VADTRDRAGDRAGAGEAGGDP  | 200 |
| KO-MY-7b            | RSSPIARRAAGCGCCWSPTRWRRSCGSSTTTWPRCSTCCRSSSWGSPPTCSTSSPSRRASAGGARHRHSRRRR                               | 200 |
| KO-ZH-1a            | RAAGCGCCWSPTRWRRSCGSSTTTWPRCSTCCRSSSWGSPPTCSTSSPSRRASAGGARHRHSRRRR                                      | 200 |
| KO-ZH-1b            | AAAAGVRRDGGGAAGAQP RP GHAARPVAGRRAGARRRRARRPRPRVAPVPVAVLAGTGVGGGAEGERA VADTRDRAGDRAGAGEAGDGGGRHRQPGELQ  | 200 |
| KO-ZH-2a            | GDRRRLGAPDAAAAGVRRDGGGAAGAQP RP GHAARPVAGRRAGARRRRARRPRPRVAPVPVAVLAGTGVGGGAEGERA VADTRDRAGDRAGAGEAGGDP  | 200 |
| KO-ZH-2b            | IARRAAGCGCCWSPTRWRRSCGSSTTTWPRCSTCCRSSSWGSPPTCSTSSPSRRASAGGARHRHSRRRR                                   | 200 |
| KO-ZH-3a            | GDRRRLGAPDAAAAGVRRDGGGAAGAQP RP GHAARPVAGRRAGARRRRARRPRPRVAPVPVAVLAGTGVGGGAEGERA VADTRDRAGDRAGAGEAGGDP  | 200 |
| KO-ZH-3b            | RSSPIARRAAGCGCCWSPTRWRRSCGSSTTTWPRCSTCCRSSSWGSPPTCSTSSPSRRASAGGARHRHSRRRR                               | 200 |
| NIL <sup>Z597</sup> | VEVGINDPASCSEIEISLEQEI GDRASEKNEGAASMIALVGLLRYAKCVLFSATPRPSDSNSKADVEAEDGEPPVP                           | 300 |
| NIL <sup>M46</sup>  | VEVGINDPASCSEIEISLEQEI GDRASEKNEGAASMIALVGLLRYAKCVLFSATPRPSDSNSKADVEAEDGEPPVP                           | 300 |
| ZH161               | VEVGINDPASCSEIEISLEQEI GDRASEKNEGAASMIALVGLLRYAKCVLFSATPRPSDSNSKADVEAEDGEPPVP                           | 300 |
| KO-ZS-1             |                                                                                                         | 300 |
| KO-ZS-2             | GGGRHQRPGELQRGDREPAGDRRPCLGEMDGLHDSRRPPVCQVRPVQRHASAFRFQFG                                              | 300 |
| KO-MY-1             | GGGRHQRPGELQRGDREPAGDRRPCLGEMDGLHDSRRPPVCQVRPVQRHASAFRFQFG                                              | 300 |
| KO-MY-2a            | GGGRHQRPGELQRGDREPAGDRRPCLGEMDGLHDSRRPPVCQVRPVQRHASAFRFQFG                                              | 300 |
| KO-MY-2b            |                                                                                                         | 300 |
| KO-MY-3a            | GGGRHQRPGELQRGDREPAGDRRPCLGEMDGLHDSRRPPVCQVRPVQRHASAFRFQFG                                              | 300 |
| KO-MY-3b            |                                                                                                         | 300 |
| KO-MY-4a            | GGGRHQRPGELQRGDREPAGDRRPCLGEMDGLHDSRRPPVCQVRPVQRHASAFRFQFG                                              | 300 |
| KO-MY-4b            |                                                                                                         | 300 |
| KO-MY-5a            | GGGRHQRPGELQRGDREPAGDRRPCLGEMDGLHDSRRPPVCQVRPVQRHASAFRFQFG                                              | 300 |
| KO-MY-5b            |                                                                                                         | 300 |
| KO-MY-6a            | GGGRHQRPGELQRGDREPAGDRRPCLGEMDGLHDSRRPPVCQVRPVQRHASAFRFQFG                                              | 300 |
| KO-MY-6b            |                                                                                                         | 300 |
| KO-MY-7a            | GGGRHQRPGELQRGDREPAGDRRPCLGEMDGLHDSRRPPVCQVRPVQRHASAFRFQFG                                              | 300 |
| KO-MY-7b            |                                                                                                         | 300 |
| KO-ZH-1a            |                                                                                                         | 300 |
| KO-ZH-1b            | RGDREPAGDRRPCLGEMDGLHDSRRPPVCQVRPVQRHASAFRFQFG                                                          | 300 |
| KO-ZH-2a            | GGGRHQRPGELQRGDREPAGDRRPCLGEMDGLHDSRRPPVCQVRPVQRHASAFRFQFG                                              | 300 |
| KO-ZH-2b            |                                                                                                         | 300 |
| KO-ZH-3a            | GGGRHQRPGELQRGDREPAGDRRPCLGEMDGLHDSRRPPVCQVRPVQRHASAFRFQFG                                              | 300 |
| KO-ZH-3b            |                                                                                                         | 300 |
| NIL <sup>Z597</sup> | RESIDRWFSFGKSTC PKTQGVLANLELVSNKALKNLSIKWCRENGVAMEACEASKSEQAQVAANKAALEAARMTASFLVKKLSVSFSPDAANRVVHEIR    | 400 |
| NIL <sup>M46</sup>  | RESIDRWFSFGKSTC PKTQGVLANLELVSNKALKNLSIKWCRENGVAMEACEASKSEQAQVAANKAALEAARMTASFLVKKLSVSFSPDAANRVVHEIR    | 400 |
| ZH161               | RESIDRWFSFGKSTC PKTQGVLANLELVSNKALKNLSIKWCRENGVAMEACEASKSEQAQVAANKAALEAARMTASFLVKKLSVSFSPDAANRVVHEIR    | 400 |
| KO-ZS-1             |                                                                                                         | 400 |
| KO-ZS-2             |                                                                                                         | 400 |
| KO-MY-1             |                                                                                                         | 400 |
| KO-MY-2a            |                                                                                                         | 400 |
| KO-MY-2b            |                                                                                                         | 400 |
| KO-MY-3a            |                                                                                                         | 400 |
| KO-MY-3b            |                                                                                                         | 400 |
| KO-MY-4a            |                                                                                                         | 400 |
| KO-MY-4b            |                                                                                                         | 400 |
| KO-MY-5             |                                                                                                         | 400 |
| KO-MY-5b            |                                                                                                         | 400 |
| KO-MY-6a            |                                                                                                         | 400 |
| KO-MY-6b            |                                                                                                         | 400 |
| KO-MY-7a            |                                                                                                         | 400 |
| KO-MY-7b            |                                                                                                         | 400 |
| KO-ZH-1a            |                                                                                                         | 400 |
| KO-ZH-1b            |                                                                                                         | 400 |
| KO-ZH-2a            |                                                                                                         | 400 |
| KO-ZH-2b            |                                                                                                         | 400 |
| KO-ZH-3a            |                                                                                                         | 400 |

|                     |                                                                            |     |
|---------------------|----------------------------------------------------------------------------|-----|
| KO-ZH-3b            |                                                                            | 400 |
| NIL <sup>ZS97</sup> | LLSKSGSENRAFVGEAGAVPLLVPLLYSEDAGLQNAVTTALLNLSIT                            | 500 |
| NIL <sup>MY46</sup> | LLSKSGSENRAFVGEAGAVPLLVPLLYSEDAGLQNAVTTALLNLSIT                            | 500 |
| ZH161               | LLSKSGSENRAFVGEAGAVPLLVPLLYSEDAGLQNAVTTALLNLSIT                            | 500 |
| KO-ZS-1             |                                                                            | 500 |
| KO-ZS-2             |                                                                            | 500 |
| KO-MY-1             |                                                                            | 500 |
| KO-MY-2a            |                                                                            | 500 |
| KO-MY-2b            |                                                                            | 500 |
| KO-MY-3a            |                                                                            | 500 |
| KO-MY-3b            |                                                                            | 500 |
| KO-MY-4a            |                                                                            | 500 |
| KO-MY-4b            |                                                                            | 500 |
| KO-MY-5a            |                                                                            | 500 |
| KO-MY-5b            |                                                                            | 500 |
| KO-MY-6a            |                                                                            | 500 |
| KO-MY-6b            |                                                                            | 500 |
| KO-MY-7b            |                                                                            | 500 |
| KO-MY-7b            |                                                                            | 500 |
| KO-ZH-1a            |                                                                            | 500 |
| KO-ZH-1b            |                                                                            | 500 |
| KO-ZH-2a            |                                                                            | 500 |
| KO-ZH-2b            |                                                                            | 500 |
| KO-ZH-3a            |                                                                            | 500 |
| KO-ZH-3b            |                                                                            | 500 |
| NIL <sup>ZS97</sup> | QSVVEKLVHLVRTGPTSTKKDALAALLTLAGERENVGKLVDAAGVAEVALSAISKEETAAAVLAALAKRGGAEI | 600 |
| NIL <sup>MY46</sup> | QSVVEKLVHLVRTGPTSTKKDALAALLTLAGERENVGKLVDAAGVAEVALSAISKEETAAAVLAALAKRGGAEI | 600 |
| ZH161               | QSVVEKLVHLVRTGPTSTKKDALAALLTLAGERENVGKLVDAAGVAEVALSAISKEETAAAVLAALAKRGGAEI | 600 |
| KO-ZS-1             |                                                                            | 600 |
| KO-ZS-2             |                                                                            | 600 |
| KO-MY-1             |                                                                            | 600 |
| KO-MY-2a            |                                                                            | 600 |
| KO-MY-2b            |                                                                            | 600 |
| KO-MY-3a            |                                                                            | 600 |
| KO-MY-3b            |                                                                            | 600 |
| KO-MY-4a            |                                                                            | 600 |
| KO-MY-4b            |                                                                            | 600 |
| KO-MY-5a            |                                                                            | 600 |
| KO-MY-5b            |                                                                            | 600 |
| KO-MY-6a            |                                                                            | 600 |
| KO-MY-6b            |                                                                            | 600 |
| KO-MY-7a            |                                                                            | 600 |
| KO-MY-7b            |                                                                            | 600 |
| KO-ZH-1a            |                                                                            | 600 |
| KO-ZH-1b            |                                                                            | 600 |
| KO-ZH-2a            |                                                                            | 600 |
| KO-ZH-2b            |                                                                            | 600 |
| KO-ZH-3a            |                                                                            | 600 |
| KO-ZH-3b            |                                                                            | 600 |
| NIL <sup>ZS97</sup> | AALVLLCRRLGAPAVTQVMVPGVEWAIWELMSIGTERARRKAASLGRI                           | 680 |
| NIL <sup>MY46</sup> | AALVLLCRRLGAPAVTQVMVPGVEWAIWELMSIGTERARRKAASLGRI                           | 680 |
| ZH161               | AALVLLCRRLGAPAVTQVMVPGVEWAIWELMSIGTERARRKAASLGRI                           | 680 |
| KO-ZS-1             |                                                                            | 680 |
| KO-ZS-2             |                                                                            | 680 |
| KO-MY-1             |                                                                            | 680 |
| KO-MY-2a            |                                                                            | 680 |
| KO-MY-2b            |                                                                            | 680 |
| KO-MY-3a            |                                                                            | 680 |
| KO-MY-3b            |                                                                            | 680 |
| KO-MY-4a            |                                                                            | 680 |
| KO-MY-4b            |                                                                            | 680 |
| KO-MY-5a            |                                                                            | 680 |
| KO-MY-5b            |                                                                            | 680 |
| KO-MY-6a            |                                                                            | 680 |
| KO-MY-6b            |                                                                            | 680 |
| KO-MY-7a            |                                                                            | 680 |
| KO-MY-7b            |                                                                            | 680 |
| KO-ZH-1a            |                                                                            | 680 |
| KO-ZH-1b            |                                                                            | 680 |
| KO-ZH-2a            |                                                                            | 680 |
| KO-ZH-2b            |                                                                            | 680 |
| KO-ZH-3a            |                                                                            | 680 |
| KO-ZH-3b            |                                                                            | 680 |

**Figure S1.** Amino acid sequences of OsPUB3 in the three recipients (NIL<sup>ZS97</sup>, NIL<sup>MY46</sup> and ZH161) and their homozygous mutants. The U-box motif and Armadillo repeat are highlighted in blue and green, respectively. Differences among the three recipients are highlighted in yellow. Differences between the mutants and the recipients are indicated in red letters.
